# Supplementary material
Source: PubMed Central journal article supplement (PMC9793890)
Supplement: NIHMS1849659-supplement-1849659_Sup_Figures___notes.pdf [file NIHMS1849659-supplement-1849659_Sup_Figures___notes.pdf]

## Supplementary Figures

### Cell Sorting

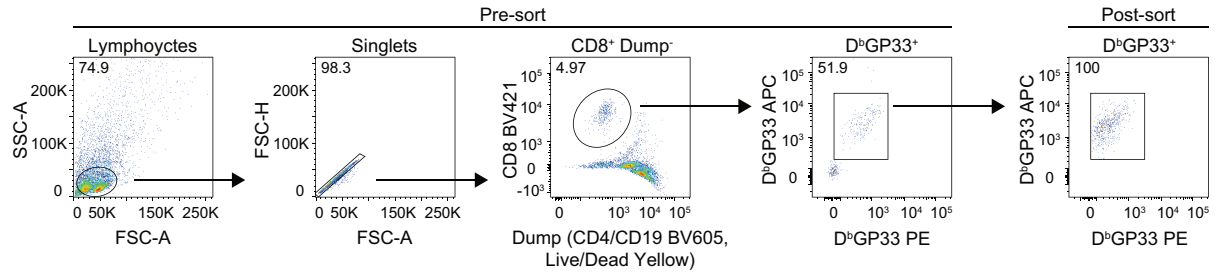

**Supplementary Fig. 1. Gating strategy for sorting D<sup>b</sup>GP33<sup>+</sup> CD8<sup>+</sup> T cells in Fig. 2, Fig. 4, Fig. 6d, e, Extended Data Fig. 3, and Extended Data Fig. 6.** Splenocytes isolated from LCMV chronically infected of various treatment groups were gated on lymphocytes, singlets, live CD8<sup>+</sup> T cells, and D<sup>b</sup>GP33<sup>+</sup> CD8<sup>+</sup> T cells were sorted.

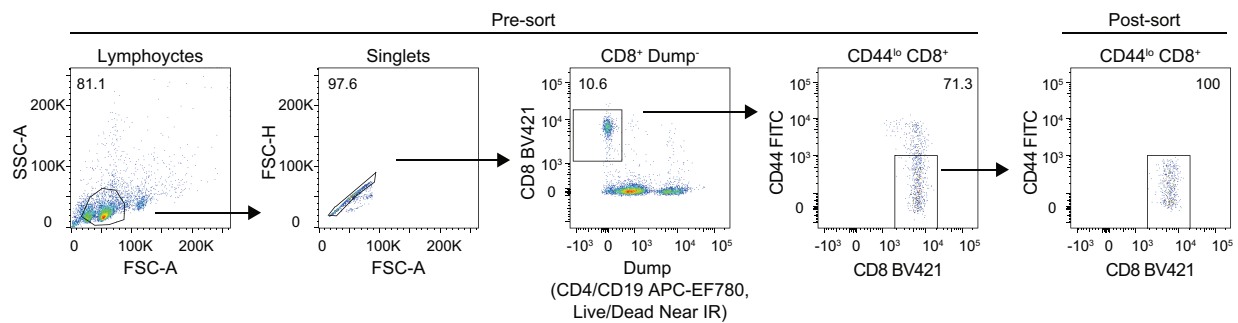

**Supplementary Fig. 2. Gating strategy for sorting naive CD8<sup>+</sup> T cells in Fig. 2, 6d, and Extended Data Fig. 3.** Splenocytes isolated from uninfected C57BL6/J mice were gated on lymphocytes, singlets, live CD8<sup>+</sup> T cells, and CD44<sup>lo</sup> CD8<sup>+</sup> T cells were sorted. EF, eFluor.

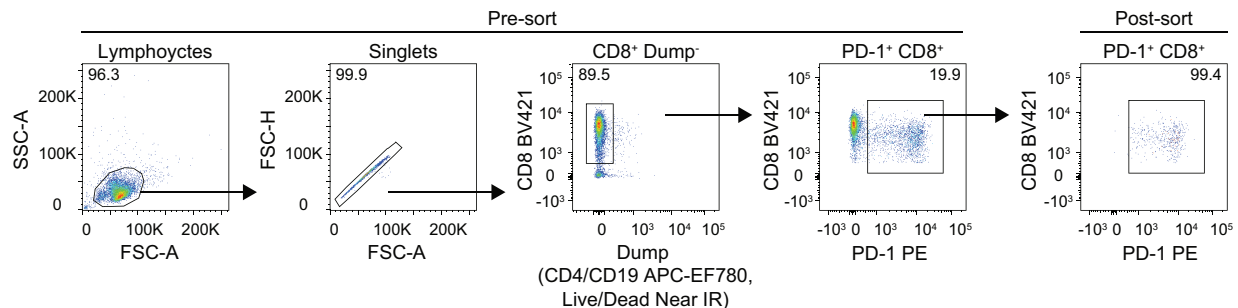

**Supplementary Fig. 3. Gating strategy for sorting PD-1<sup>+</sup> CD8<sup>+</sup> T cells in Fig. 3f.** Splenocytes isolated from LCMV chronically infected mice of various treatment groups were gated on lymphocytes, singlets, live CD8<sup>+</sup> T cells, and PD-1<sup>+</sup> CD8<sup>+</sup> T cells were sorted. EF, eFluor.

## T cell analysis (CD8<sup>+</sup> T cells)

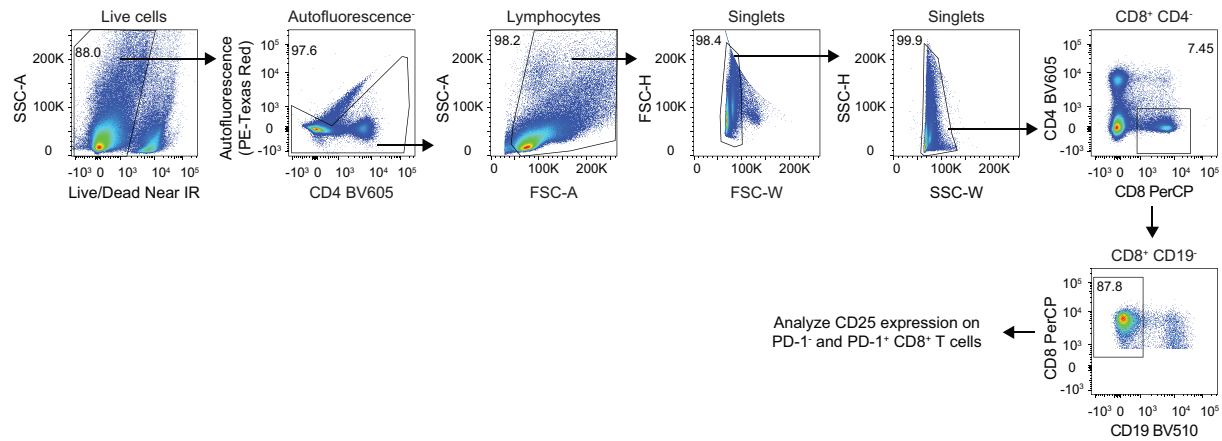

**Supplementary Fig. 4. Gating strategy for CD8<sup>+</sup> T cells in Extended Data Fig. 12b, c.** Splenocytes isolated from LCMV chronically infected mice of various treatment groups were gated on live cells, lymphocytes, singlets, autofluorescence<sup>-</sup> cells, CD8<sup>+</sup> T cells, and CD25 expression on PD-1<sup>-</sup> and PD-1<sup>+</sup> CD8<sup>+</sup> T cells were analyzed.

**T cell analysis (LCMV-specific CD8<sup>+</sup> T cells, PD-1<sup>+</sup> CD8<sup>+</sup> T cells, naive CD44<sup>lo</sup> CD8<sup>+</sup> T cells, LCMV-specific CD4<sup>+</sup> T cells, and Foxp3<sup>+</sup> CD4<sup>+</sup> T cells)**

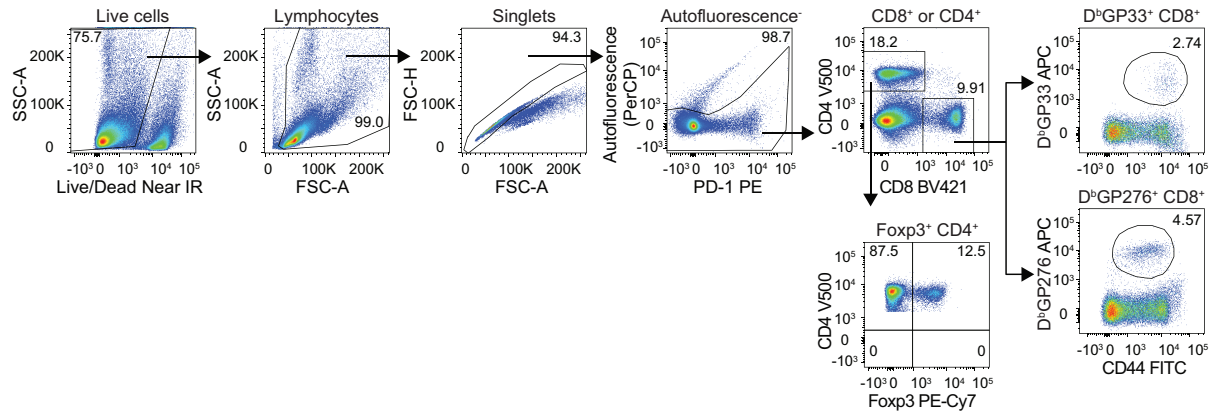

**Supplementary Fig. 5. Gating strategy for LCMV-specific CD8<sup>+</sup> T cells and Foxp3<sup>+</sup> CD4<sup>+</sup> T cells in Fig. 5b, 6b, Extended Data Fig. 1b, 1h, 1i, 7b, 8, 10a, 10b, 11, and 13b.** Cells isolated from various tissues in LCMV chronically infected mice of various treatment groups were gated on live cells, lymphocytes, singlets, autofluorescence<sup>-</sup> cells, CD8<sup>+</sup>/CD4<sup>+</sup> T cells, and LCMV-specific D<sup>b</sup>GP33<sup>+</sup> or D<sup>b</sup>GP276<sup>+</sup> CD8<sup>+</sup> T cells or Foxp3<sup>+</sup> CD4<sup>+</sup> T cells were analyzed. For Fig. 1h, i, anti-CD8b.2 antibody was used to detect CD8<sup>+</sup> T cells.

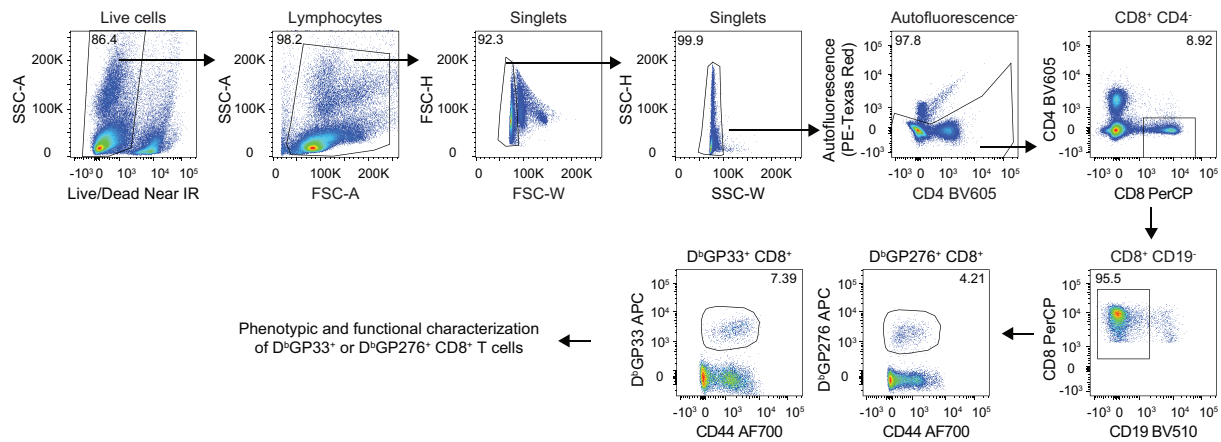

**Supplementary Fig. 6. Gating strategy for LCMV-specific CD8<sup>+</sup> T cells in Fig. 5d, Extended Data Fig. 4, 9f, 9h, 9i, 9k, 9l, 9n, 9o, 10b, and 10d.** Splenocytes isolated from LCMV chronically infected mice of various treatment groups were gated on live cells, lymphocytes, singlets, autofluorescence<sup>-</sup> cells, CD8<sup>+</sup> T cells, and LCMV-specific D<sup>b</sup>GP33<sup>+</sup> or D<sup>b</sup>GP276<sup>+</sup> CD8<sup>+</sup> T cells were analyzed. AF, Alexa Fluor.

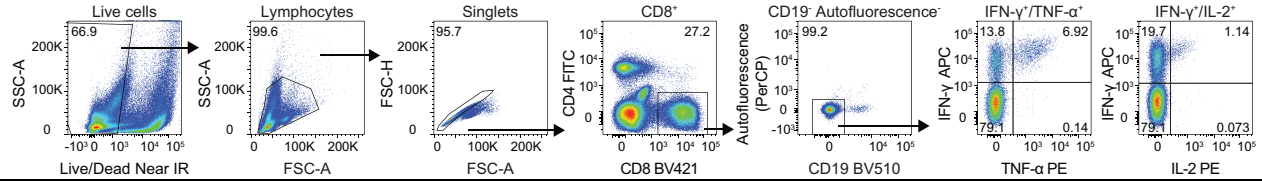

**Supplementary Fig. 7. Gating strategy for functional characterization of LCMV-specific CD8<sup>+</sup> T cells in Fig. 5c, 6c, Extended Data Fig. 1c, and Extended Data Fig. 10c.** Splenocytes were isolated from LCMV chronically infected mice of various treatment groups. After stimulating them with pool of 9 LCMV-specific peptides for 5 hours, cells were gated on live cells, lymphocytes, singlets, CD8<sup>+</sup> T cells, autofluorescence<sup>-</sup> cells, and cytokine producing LCMV-specific CD8<sup>+</sup> T cells were analyzed. AF, Alexa Fluor.

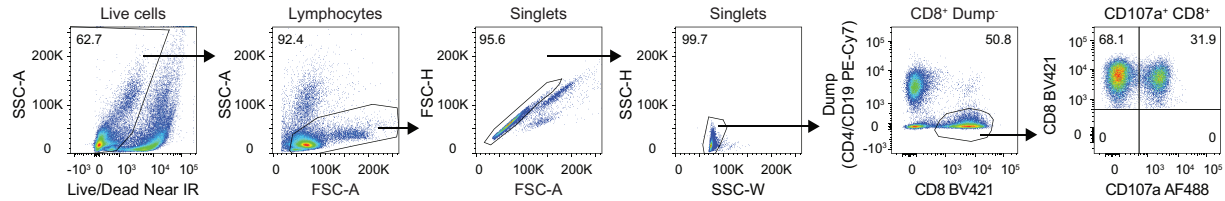

**Supplementary Fig. 8. Gating strategy for functional characterization of LCMV-specific CD8<sup>+</sup> T cells in Extended Data Fig. 1d.** Splenocytes were isolated from LCMV chronically infected mice of various treatment groups. After stimulating them with pool of 9 LCMV-specific peptides for 5 hours, cells were gated on live cells, lymphocytes, singlets, CD8<sup>+</sup> T cells, and degranulating LCMV-specific CD8<sup>+</sup> T cells were analyzed. AF, Alexa Fluor.

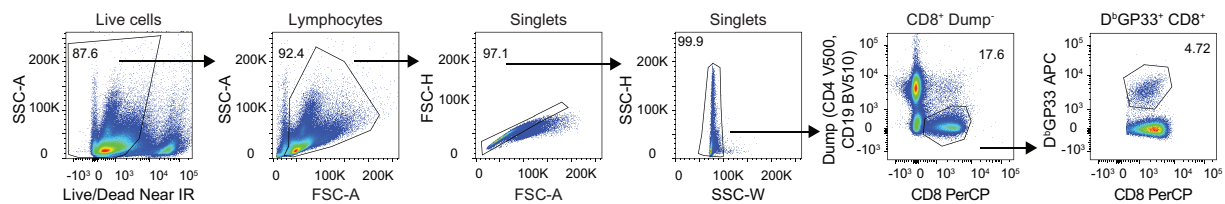

**Supplementary Fig. 9. Gating strategy for LCMV-specific CD8<sup>+</sup> T cells in Extended Data Fig. 12e, f.** Splenocytes isolated from LCMV chronically infected mice of various treatment groups were gated on live cells, lymphocytes, singlets, CD8<sup>+</sup> T cells, and LCMV-specific D<sup>b</sup>GP33<sup>+</sup> CD8<sup>+</sup> T cells were analyzed.

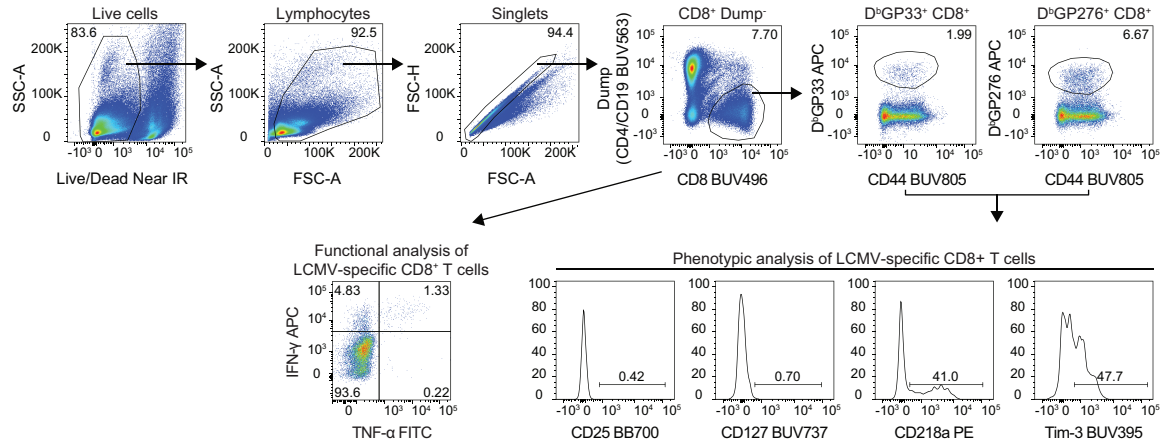

**Supplementary Fig. 10. Gating strategy for LCMV-specific CD8<sup>+</sup> T cells in Extended Data Fig. 13c, d.** Splenocytes isolated from LCMV chronically infected mice of various treatment groups were gated on live cells, lymphocytes, singlets, CD8<sup>+</sup> T cells, and LCMV-specific D<sup>b</sup>GP33<sup>+</sup> CD8<sup>+</sup> T cells were analyzed.

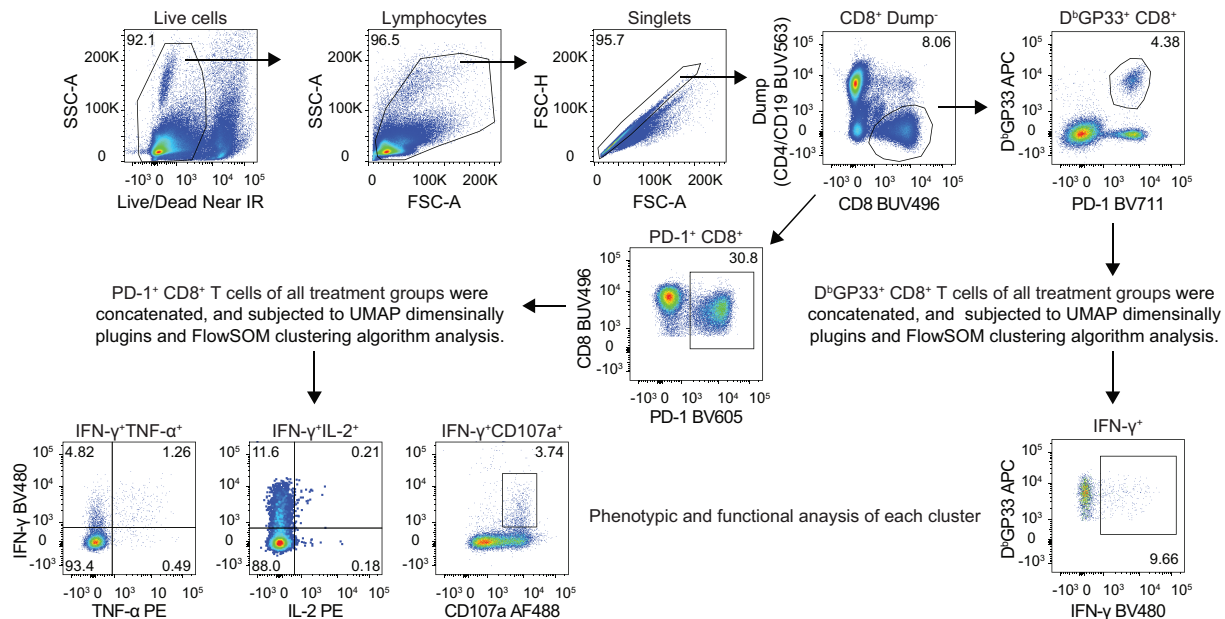

**Supplementary Fig. 11. Gating strategy for phenotypic and functional characterization of LCMV-specific CD8<sup>+</sup> T cells generated by PD-1, IL-2, and the combination therapy in Fig. 3a-e and Extended Data Fig. 5.** Splenocytes isolated from LCMV chronically infected mice of various treatment groups were gated on live cells, lymphocytes, singlets, CD8<sup>+</sup> T cells, and LCMV-specific PD-1<sup>+</sup> CD8<sup>+</sup> T cells or D<sup>b</sup>GP33<sup>+</sup> CD8<sup>+</sup> T cells or were analyzed. AF, Alexa Fluor.

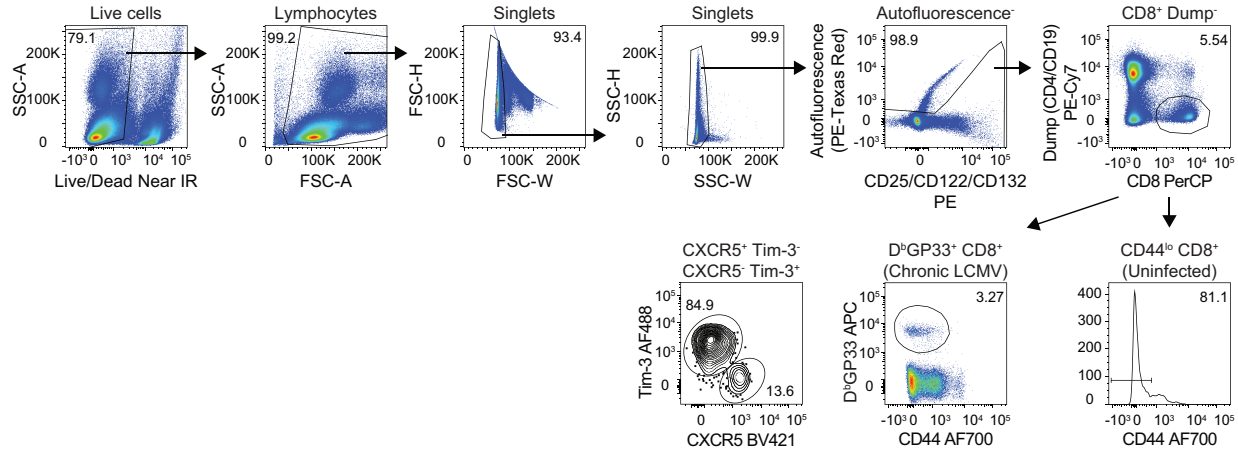

**Supplementary Fig. 12. Gating strategy for analyzing IL-2 receptor expression on stem-like ( $CXCR5^+Tim-3^-$ ) and exhausted ( $CXCR5^-Tim-3^+$ )  $CD8^+$  T-cell subset in  $D^bGP33^+CD8^+$  T cells and naive  $CD8^+$  T cells in Extended Data Fig. 9g, 9j, and 9m.** Splenocytes isolated from chronically LCMV-infected mice or uninfected C57BL/6J mice were gated on live cells, lymphocytes, singlets, autofluorescence<sup>-</sup> cells, and  $CD8^+$  were identified. Two subsets of  $D^bGP33^+CD8^+$  T cells in chronically LCMV-infected mice and  $CD44^{lo}CD8^+$  T cells in uninfected C57BL/6J mice were analyzed for IL-2 receptor expression. AF, Alexa Fluor.

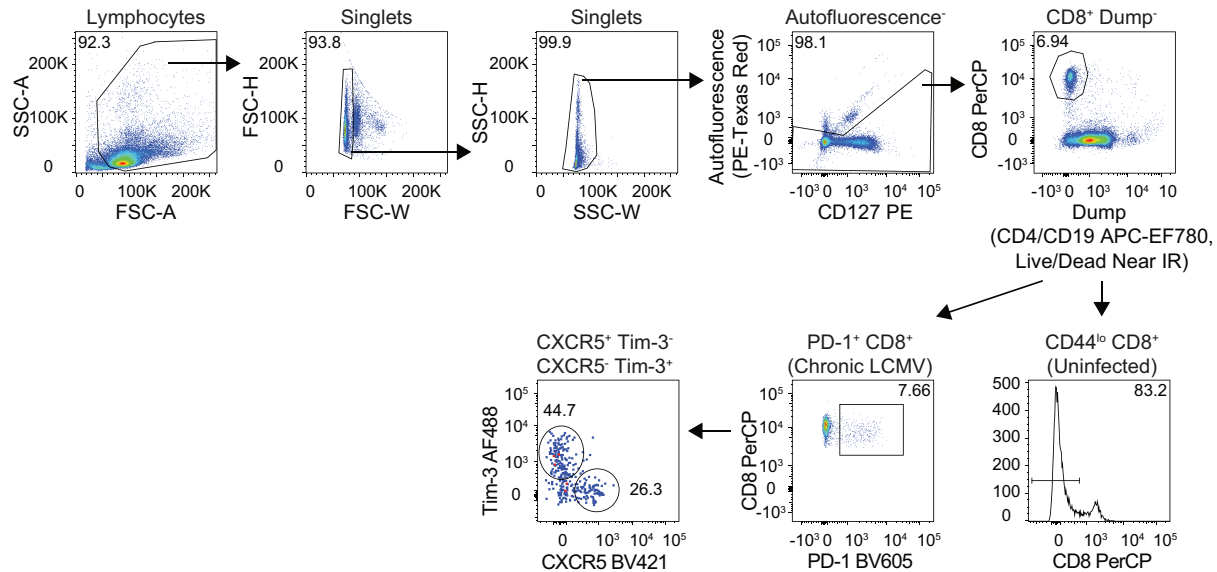

**Supplementary Fig. 13. Gating strategy for analyzing CD25 expression on stem-like ( $CXCR5^+Tim-3^-$ ) and exhausted ( $CXCR5^-Tim-3^+$ )  $CD8^+$  T-cell subset in  $PD-1^+CD8^+$  T cells and naive  $CD8^+$  T cells in Extended Data Fig. 9b.** Splenocytes isolated from chronically LCMV-infected mice or uninfected C57BL/6J mice were gated on live cells, lymphocytes, singlets, autofluorescence<sup>-</sup> cells, and live  $CD8^+$  were identified. Two subsets of  $D^bGP33^+CD8^+$  T cells in chronically LCMV-infected mice and  $CD44^{lo}CD8^+$  T cells in uninfected C57BL/6J mice were analyzed for CD25 expression. AF, Alexa Fluor; EF, eFluor.

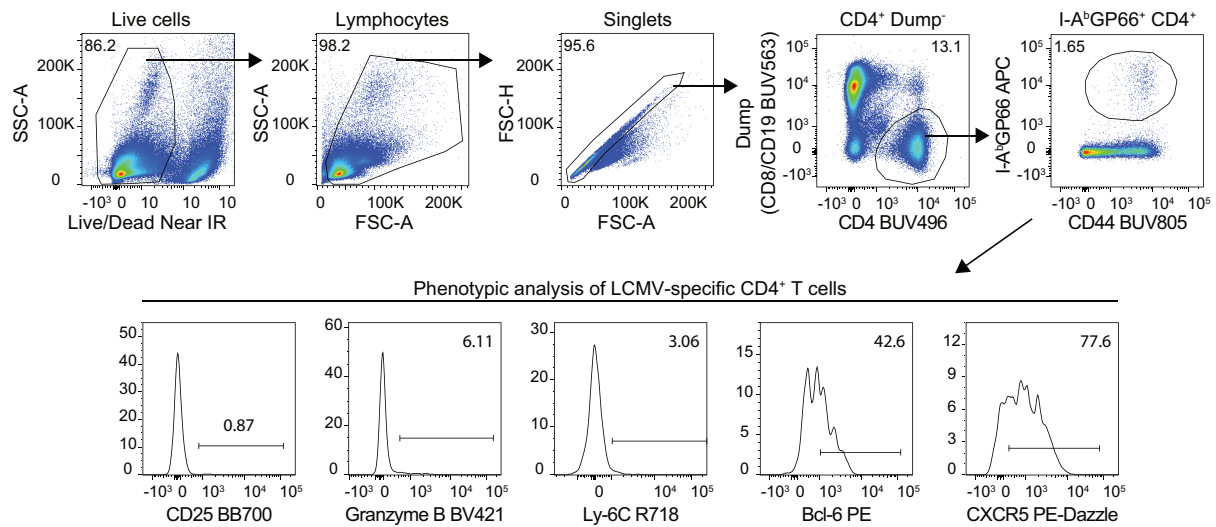

**Supplementary Fig. 14. Gating strategy for LCMV-specific CD4<sup>+</sup> T cells in Extended Data Fig. 13f.** Mice were infected with LCMV clone 13. At day 25 post-infection, they were left untreated, or treated with anti-PD-L1 antibody, anti-PD-L1 plus IL-2wt, or anti-PD-L1 plus IL-2v. Splenocytes were isolated at day 34 post-infection, gated on live cells, lymphocytes, singlets, CD4<sup>+</sup> T cells, and LCMV-specific I-A<sup>b</sup>GP66<sup>+</sup> CD4<sup>+</sup> T cells were identified.

## T cell analysis (donor CD45.2<sup>+</sup> CD8<sup>+</sup> T cells in adoptive transfer experiments)

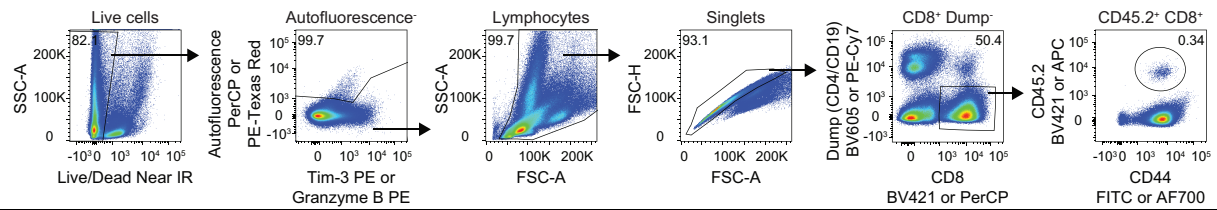

**Supplementary Fig. 15. Gating strategy for donor CD45.2<sup>+</sup> CD8<sup>+</sup> T cells in Fig. 1b, c, Extended Data Fig. 2b-d, and Extended Data Fig. 9c, d.** Cells isolated from various tissues in LCMV chronically infected recipient mice (CD45.1<sup>+</sup>) of different treatment groups were gated on live cells, autofluorescence<sup>-</sup> cells, lymphocytes, singlets, CD8<sup>+</sup> T cells, and donor CD45.2<sup>+</sup> CD8<sup>+</sup> T cells were analyzed for their frequency and CD25 expression. AF, Alexa Fluor.



## Supplementary Notes

**Supplementary Data 1. Functional significance of cis-regulatory regions more open in LCMV-specific CD8<sup>+</sup> T cells after PD-1/IL-2 combination therapy compared to PD-1 monotherapy.** Functional significance of cis-regulatory regions in DbGP33<sup>+</sup> CD8<sup>+</sup> T cells is defined by using ATAC-seq data and genomic regions enrichment of annotations tool (GREAT)<sup>26</sup> between PD-1 monotherapy and the combination therapy. Gene Ontology (GO) terms identified by open regions for the combination therapy are listed. The p-values reported by GREAT were calculated using a hypergeometric test on chromosome coordinates of the peaks for the corresponding comparisons (foreground) compared to all consensus peaks (background).

**Supplementary Data 2. Functional significance of cis-regulatory regions more closed in LCMV-specific CD8<sup>+</sup> T cells after PD-1/IL-2 combination therapy compared to PD-1 monotherapy.** Functional significance of cis-regulatory regions in DbGP33<sup>+</sup> CD8<sup>+</sup> T cells is defined by using ATAC-seq data and genomic regions enrichment of annotations tool (GREAT)<sup>26</sup> between PD-1 monotherapy and the combination therapy. Gene Ontology (GO) terms identified by closed regions for the combination therapy are listed. The p-values reported by GREAT were calculated using a hypergeometric test on chromosome coordinates of the peaks for the corresponding comparisons (foreground) compared to all consensus peaks (background).

**Supplementary Data 3. Transcription factor family members regulating chromatin accessibility in LCMV-specific CD8<sup>+</sup> T cells in acute and chronic infection and after PD-1/IL-2 combination therapy.** The lists of transcription factor family members determined by HOMER analysis<sup>57</sup> that are highly accessible to differentially accessible regions in each of the 10 clusters of Extended Data Fig. 6c. The p-values reported by HOMER<sup>57</sup> were calculated using a hypergeometric test for enrichment of the motif in the sequences of the peaks for the corresponding comparisons (target/foreground) compared to that motif's enrichment in the sequences of the peaks not significantly different.
